# Supplementary material
Source: PubMed Central journal article supplement (PMC5929197)
Supplement: tpmd170516.SD1.pdf [file tpmd170516.SD1.pdf]

## SUPPLEMENTAL MATERIAL

**Congenital Chagas Study Group.** The following investigators and institutions are part of the Congenital Chagas Study Group and participated in the study:

**Principal Investigator:** Pierre Buekens.

**Steering Committee:**

**USA:** Pierre Buekens, Dawn M. Wesson, Elizabeth Howard, and Claudia Herrera (School of Public Health and Tropical Medicine, Tulane University).

**Belgium:** Yves Carlier and Carine Truyens (Laboratoire de Parasitologie, Université Libre de Bruxelles).

**Argentina:** Fernando Althabe, José M Belizán, and Sergio Sosa-Estani (Instituto de Efectividad Clínica y Sanitaria).

**Honduras:** Jackeline Alger, Concepción Zúniga, and María Luisa Matute.

**Mexico:** Eric Dumonteil and Rubí Gamboa-León.

**Uruguay:** Alvaro Ciganda and María Luisa Cafferata (Unidad de Investigación Clínica y Epidemiológica Montevideo).

**Data Coordinating Center:** Alvaro Ciganda, Giselle Tomasso, and María Luisa Cafferata (Unidad de Investigación Clínica y Epidemiológica Montevideo).

**Statistical Support:** Luz Gibbons (Instituto de Efectividad Clínica y Sanitaria).

**Country Coordinating Teams:** Sergio Sosa-Estani (Argentina); Jackeline Alger (Honduras); Rubi Gamboa-León and Eric Dumonteil (Mexico).

**Research Participating Institutions:** The Tulane University School of Public Health and Tropical Medicine; Instituto de Efectividad Clínica y Sanitaria (Argentina); Unidad de Investigación Clínica y Epidemiológica Montevideo (Uruguay); Instituto de Enfermedades Infecciosas y Parasitología Antonio Vidal (Honduras); Université Libre de Bruxelles (Belgium); Universidad Autónoma de Yucatán (México).

**Institutional Review Boards:** Tulane University; Centro de Estudios Médicos Norberto Quirno, Buenos Aires; Universidad Autónoma de Yucatán, Mérida; Facultad de Ciencias Médicas, Universidad Nacional Autónoma de Honduras, Tegucigalpa.

**Participating Hospitals and Staff:**

**Argentina:**

**Tucumán:** *Instituto de Maternidad y Ginecología Nuestra Señora de las Mercedes:* Mirta Hamaud, Luis Bravo Ocaranza, Alba Brizuela, Rossana Chahla, Patricia Contreras, Ezequiel Cruz Arrieta, Sebastián Díaz, Gladys Galván, Gabriela Garbarino, Flórida López, Antonia Lavenia, María Lillian Lopez, Claudio Moreno, Gerardo Murga, José Núñez, Nora Soraya Suarez, Natalia Teseira, and Gimena Zelaya.

**Programa Nacional de Chagas:** Isolina Flores, Antonia Lavenia, Claudio Moreno, Víctor Royer.

**Mexico:**

**Centro de Investigaciones Regionales “Dr. Hideyo Noguchi”:** Luis Ángel Angulo, Patricia C. Cocom Góngora, Victoria Cruz Baas, Jesús Gurubel Maldonado, Damián Lavalle Kantun, Guillermo Iván Meza González, María Jesús Ramírez-Sierra, María de los Ángeles Tangoa Villacorta, Francisco Ucan Varguez, and Rubén Omar Vargas Torres.

**Hospital General de Valladolid:** Aurora Rubí Aguilar Peraza, Dianely Cahuich Chel, Fabián Leonel Canché Nahualth, Rudy Coronado Bastarrachea, María de Lourdes Chel Chan, María

de la Luz Mendoza Sologuren, Alfredo Novelo Antunes, Roberto Ortiz Laguna, Jordy Javier Pool Aban, José Melchor Pool Aban, Arlin Xolo Málaga, and Fernando Zaldívar Tun.

**Hospital Materno Infantil:** M. C. Verónica Aranda Chan, Wilberth Chalé Balboa, Adriana Chacón López, Noemi Cigarroa Rodríguez, Isabel Cruz Baas, María Guadalupe Díaz Cauch, Wendy Dzib Guerra, Lucía Estrella Chable, Paulina Estrella Chable, Zuemy Gamboa León, Indra González Puc, Verónica Herrera Pech, Lingbergh Mendoza Villalobos, Jacqueline Montero Pérez, Dora Padilla Castro, Claudio Poot Pool, Raquel Rejón Escalante, and Vanessa Ventura Estrella.

**Honduras:**

**Tegucigalpa:** *Instituto de Enfermedades Infecciosas y Parasitología Antonio Vidal:* Edna Maradiaga, and Karla Rivera.

**Laboratorio Nacional de Vigilancia de la Salud, Secretaría de Salud de Honduras:** Jéssica María Henríquez Godoy, Andres Murillo, and Christian Valladares.

**Santa Bárbara:** *Región Departamental de Salud de Santa Bárbara:* Norma Bustamante, Benjamín López, Martha Mancía, and Adán Pavón.

**Laboratorio Regional de Vigilancia de la Salud:** Yolanda Mejía, Alice Ordoñez, Dalia I. Piedy, and Miguel Á. Zúñiga.

**Hospital Santa Bárbara Integrado:** German Blanco, Marly Castellanos, Lucila Inestroza, Juan Santos Jacob, Adalberto Mejía, Suyapa Muñoz, Karen Perdomo, Damaris Perdomo, Julia Pineda, Sergio Reyes Stott, Julia Romero, and Olga Sabillón.

**Intibucá:** *Región Departamental de Salud:* Luis Israel Girón, Yovany Cardona, Uriel Osorio, and Roger Reyes.

**Hospital Enrique Aguilar Cerrato:** Domingo Amador, Ramón D. Argueta, Filomena Banegas, Mirna Cantarero, Guillermo Casco, Suyapa Cruz, Jaime del Cid, Bernardita Díaz, Nancy López, Edis Manzanares, María N. Melgar, Hazel M. Moreno, Lorena A. Osorio, Erika M. Rivas, Marco A. Sorto, Socrates A. Varela, and Keyla X. Yáñez.

**Molecular methods.** *Measures to limit/avoid carry-over contamination.* The main source of false-positive results is sample contamination by product carryover from previous PCR reactions targeting the same amplicon. To limit/avoid this risk, we took the following measures:

- Guanidine EDTA blood (GEB) maternal and cord blood samples were stored separately from all other reagents used in DNA extraction or PCR and were only manipulated in the room dedicated to DNA extraction.
- The chamber of the Maxwell instrument for DNA extraction was cleaned with alcohol and treated by ultraviolet (UV) lighting for 40 minutes before DNA extraction and for 30 minutes after use.
- The following steps were performed in four physically separated laboratories: 1) DNA extraction, 2) preparation of PCR mixes and controls and addition of template DNA, 3) PCR amplification, and 4) gel electrophoresis. Access to these rooms is highly restricted to technicians performing the PCRs.
- Dedicated pipettes and disposable laboratory coats and materials were used at each step. After amplification, PCR tubes were opened only in laboratory #4. No one was

allowed to return from laboratory #4 to any other laboratory on the same day.

- Commercial reagents (which cannot be contaminated by *T. cruzi* DNA, as it is not an environmental microbe) were aliquoted in a room located on a separate floor from laboratories #1–4 before being stored in laboratory #2 for use. Each aliquot was used only once.
- PCR set-up in laboratory #2 was performed in two separate PCR workstations equipped with UV lighting that were turned on for 40 minutes before working with the samples (one workstation to prepare PCR mixes and the other to handle samples and controls).
- Rigorous handling conditions were implemented, including the use of aerosol-resistant pipette tips. Benches and nondisposable materials were decontaminated with diluted bleach before use, and laboratory coats and gloves were frequently changed.

In addition to the risk of carry-over contamination existing for all PCRs, there is a risk for cord blood samples to be contaminated by parasite DNA from maternal blood covering the umbilical cord during delivery. To limit this risk, the surface of the umbilical cords was cleaned with a sterile dry gauze before cord blood was collected.

**DNA extraction and quality.** DNA extraction from maternal and umbilical cord GEB samples was performed with the automated Maxwell<sup>®</sup> RSC Instrument (Promega Benelux, Leiden, The Netherlands) using standard elution volume (SEV) or low elution volume (LEV) Blood DNA Kit (Promega) following the instructions of the manufacturer. DNA was extracted from 300  $\mu$ L of maternal GEB samples with LEV kit and eluted in 100  $\mu$ L of elution buffer, with 85  $\mu$ L of eluate recovered. For cord blood samples, DNA was extracted with the SEV kit from 200  $\mu$ L GEB samples and eluted in 300  $\mu$ L elution buffer, with 200  $\mu$ L of eluate recovered. DNA concentrations were measured by spectrophotometry at 260 nm with the NanoDrop ND-1000 spectrophotometer. The purity of extracted DNA was assessed by measuring absorbance at 230 and 280 nm. The absence of PCR inhibitors in the DNA was assessed by amplifying a fragment of the glyceraldehyde-3-phosphate dehydrogenase (GAPDH) gene (see Supplemental Figure 1). In the rare case of a negative result, the sample was discarded and the DNA was re-extracted (e.g., sample 4 in Supplemental Figure 1).

**Conventional PCR assays. Primers.** *Trypanosoma cruzi* DNA was detected using the specific primer sets **Tcz1–Tcz2**, which amplify a 188-base pair (bp) segment of the highly repetitive genomic satellite DNA (satDNA) and **121–122**, which amplify a 220 bp sequence present in kDNA minicircles.<sup>22,51,52</sup> Sequences of primers were Tcz1: 5'-CGA GCT CTT GCC CAC ACG GGT GCT-3', Tcz2: 5'-CCT CCA AGC AGC GGA TAG TTC AGG-3', 121: 5'-AAA TAA TGT ACG GKG GAG ATG CAT GA-3', 122: 5'-GGTTCG ATT GGG GTT GGT GTA ATA TA-3'. PCR amplification of a fragment of the human GAPDH gene was performed using the primers pair ID 3428 available in the public database RTPprimerDB (<http://www.rtpimerdb.org>). It gives an amplicon of 199 bp. All primers were from Life Technologies Europe (Gent, Belgium).

**PCR amplification.** To detect parasite DNA, each sample was tested in duplicate using the two *T. cruzi*-specific primer sets **Tcz1–Tcz2** and **121–122**. Two microlitres (DNA from maternal samples) or 4  $\mu$ L (DNA from cord blood samples) of DNA template was added to each reaction in a total volume of 20  $\mu$ L containing 1.5 mM MgCl<sub>2</sub>, 0.2 mM of each deoxy-nucleotides triphosphate (dNTP), 0.5  $\mu$ M of each primer (Tcz1–Tcz2 or 121–122), and 0.5 U/assay of Taq polymerase. Taq polymerase and dNTPs concentrations were reduced to 0.4 U/assay and 0.15 mM, respectively, for Tcz1–Tcz2 PCR assays performed on samples extracted with LEV kit. The cycling program with Tcz1–Tcz2 included an initial denaturation at 94°C for 5 minutes, 35 amplification cycles at 94°C for 30 s, 58°C for 30 s, and 72°C for 30 s, and a terminal extension at 72°C for 10 min. Amplification with 121–122 primers was as follows: denaturation at 95°C for 5 minutes, 35 amplification cycles at 95°C for 30 s, 55.5°C for 30 s, and 72°C for 1 minute, and a terminal extension at 72°C for 1 minute. GAPDH amplification was performed under the same conditions described previously with Tcz1–Tcz2 primers.

The Hot start polymerase GoTaq<sup>®</sup> G2, dNTP Solution Mix, MgCl<sub>2</sub>, and buffer were from Promega. Amplifications were performed using the BioRad T100 thermal cycler (Bio-Rad Laboratories, Temse, Belgium) in 0.2-mL thinwalled PCR tubes.

**Detection of specific amplicon bands.** Five microlitres of PCR amplification product were submitted to gel electrophoresis in 2% agarose gels and tris-acetate-EDTA (TAE) buffer (40 mM Tris, 40 mM acetate, 1 mM EDTA) in the presence of 0.5 g/mL of GelRed nucleic acid stain (VWR

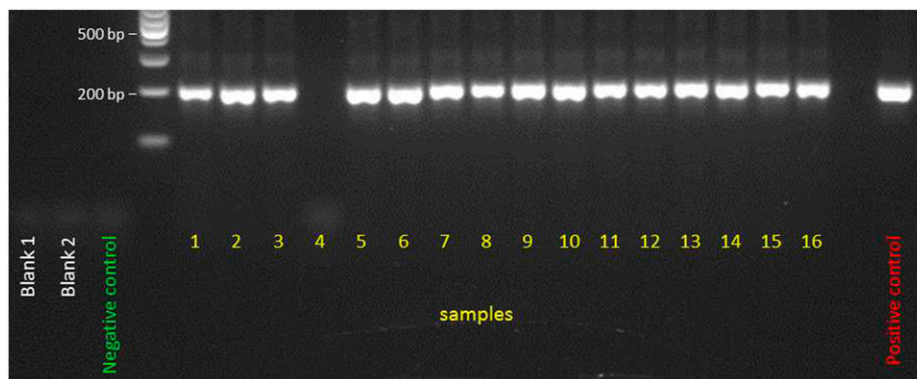

SUPPLEMENTAL FIGURE 1. Polymerase chain reaction with glyceraldehyde-3-phosphate dehydrogenase (GAPDH) primers giving an amplicon of 199 bp. Purified parasite DNA was used as negative control and DNA purified from an uninfected individual as positive control. Blanks are nuclease-free water. Sixteen samples were tested per run. In this case, GAPDH was not amplified from sample 4, and extraction was repeated.

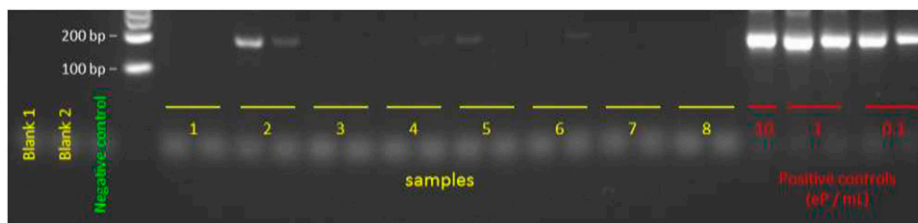

SUPPLEMENTAL FIGURE 2. Polymerase chain reaction with Tcz1–Tcz2 primers giving the specific amplicon of 188 bp. Purified parasite DNA from 10, 1, and 0.1 parasites/mL was used as a positive control. A blood sample from an uninfected individual was used as a negative control. Blanks are nuclease-free water.

International, Leuven, Belgium), which is markedly more sensitive (and safer) than the classically used ethidium bromide for DNA detection, particularly for low size DNA amplicons.<sup>53</sup> The 100 bp BenchTop DNA ladder (Promega) ranging from 100 to 1,000 bp was used as a DNA size marker. The gels were examined using the GenoSmart imaging system with a GenoView transilluminator (VWR International). Gel photographs were taken with overexposure to detect any trace of *T. cruzi* DNA amplicon. The result of the PCR was noted positive whatever the intensity of the amplicon band, even if it was faint (i.e., a negative result means that no specific amplicon band could be seen even by strongly increasing the brightness of the gel image).

Control of PCR performances and absence of contamination. Blanks (nuclease-free water), negative control (DNA extracted from GEB samples from uninfected individuals), and positive control (DNA purified from *T. cruzi* trypomastigotes obtained by culture,<sup>54</sup> Tulahuen strain–genotype VI) were included in each PCR run of eight duplicate samples. Two blanks were performed, one before (blank 1) and one after treatment of samples and positive controls. Positive controls were used at *T. cruzi* concentrations of 10, 1, and 0.1 equivalent parasite (eP)/mL. All PCR runs gave an intense amplicon band with the positive controls 10 and 1 eP/mL. *Trypanosoma cruzi* DNA used at 0.1 eP/mL gave a detectable band in 80% and 93% of PCR runs with Tcz1–Tcz2 and 121–122 primers, respectively (Supplemental Figure 2). Any PCR run showing a faint specific amplicon band in blanks or negative control, or showing no specific band in the

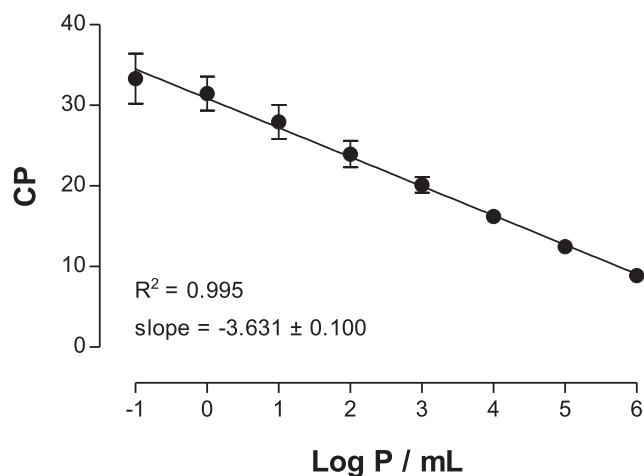

SUPPLEMENTAL FIGURE 3. *Trypanosoma cruzi* DNA standard curve obtained by real-time polymerase chain reaction (PCR) with Tcz1–Tcz2 primers. Results are expressed as the Log of the number of parasites per millilitre of blood and represent the average of the 46 PCR runs performed to test all samples.

positive control “Tc 1 eP/mL,” was discarded and repeated. Altogether, our protocols for DNA extraction and PCR, the sensitivity of DNA staining on gels, and the exposure settings for gel analysis led to an ultrasensitive conventional PCR.

**Real-time PCR.** Real-time PCR (qPCR for quantitative PCR) was performed using a LightCycler<sup>®</sup> 480 system (Roche Diagnostics) according to the manufacturer’s instructions. Reactions were performed in 25  $\mu$ L final volume with 160 nM *T. cruzi* primers Tcz1–Tcz2 (same as described previously) and Perfecta SYBRGreen SuperMix (Quanta Biosciences, VWR). Each PCR reaction contained 5  $\mu$ L of purified blood DNA (diluted 5-fold just before use) or 5  $\mu$ L *T. cruzi* DNA standard (see hereunder). The amplification protocol consisted of a denaturation phase at 95°C for 5' (RampRate 4.40  $\mu$ C/second) followed by 50 cycles of amplification (95°C 3' [RampRate 4.40  $\mu$ C/second], 65°C 1' [RampRate 2.20  $\mu$ C/second]).<sup>55</sup>

Fluorescence emission was measured at the end of each elongation step. A melting curve phase program was applied with a continuous fluorescence measurement between 50°C and 95°C (RampRate 2.20  $\mu$ C/second). The identity of the amplified products was checked by analysis of the melting curve carried out at the end of amplification. Each LightCycler run contained a negative control (no DNA added to the reaction). Each DNA sample was quantified in duplicate. Duplicate values for each DNA sample were averaged and parasite equivalent load was calculated by plotting the crossing point values against each standard of known concentration and calculation of the linear regression line of this curve. Supplemental Figure 3 shows the mean of standard curves of all qPCR performed. Results are expressed as eP/mL and were multiplied by the dilution factor of samples ( $\times 5$ ).

Standards were generated from blood obtained from an uninfected individual initially spiked with 10<sup>8</sup>/mL *T. cruzi* trypomastigotes (previously obtained in supernatant of infected fibroblasts and cryopreserved) from Tulahuen strain (TcVI

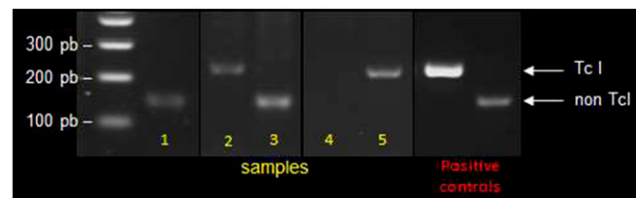

SUPPLEMENTAL FIGURE 4. Multiplex polymerase chain reaction for *Trypanosoma cruzi* genotyping in TcI vs. non-TcI discrete typing units with MV1 to MV4 primers, giving amplicons of 220 and 130 bp, respectively. Positive controls were DNA purified from *T. cruzi* epimastigotes of genotype I (strain X10/I) or VI (strain CL Brener). Results for five samples are shown.

SUPPLEMENTAL TABLE 1

Parasitological examination and cord blood polymerase chain reaction (PCR) and *Trypanosoma cruzi* serology at 10 months in infants with congenital transmission, Argentina, Honduras, and Mexico, 2011–2013.

| Country   | Subject ID | Stat-Pak cord blood | T-Detect cord blood | ELISA Wiener maternal blood | Direct parasitological examination cord blood | Direct parasitological examination at 4–8 weeks | Cord blood PCR | Stat-Pak at 10 months | T-Detect at 10 months | ELISA Wiener at 10 months | ELISA Hemagen at 10 months | Maternal conventional PCR | Maternal quantitative PCR (eP/mL) |
|-----------|------------|---------------------|---------------------|-----------------------------|-----------------------------------------------|-------------------------------------------------|----------------|-----------------------|-----------------------|---------------------------|----------------------------|---------------------------|-----------------------------------|
| Argentina | 1          | +                   | +                   | +                           | –                                             | –                                               | +              | +                     | +                     | +                         | +                          | +                         | 2.534                             |
| Argentina | 2          | +                   | +                   | +                           | –                                             | –                                               | +              | +                     | +                     | +                         | +                          | –                         | 0.579                             |
| Argentina | 3          | +                   | ND                  | +                           | –                                             | –                                               | +              | +                     | +                     | +                         | +                          | +                         | 10.738                            |
| Argentina | 4          | +                   | +                   | +                           | –                                             | +                                               | +              | –                     | –                     | –                         | –                          | +                         | 13.785                            |
| Argentina | 5          | +                   | +                   | +                           | –                                             | –                                               | +              | +                     | +                     | +                         | +                          | +                         | 8.109                             |
| Argentina | 6          | +                   | +                   | +                           | +                                             | ND                                              | +              | –                     | –                     | –                         | –                          | +                         | 1.855                             |
| Argentina | 7          | +                   | +                   | +                           | +                                             | ND                                              | +              | –                     | –                     | –                         | –                          | +                         | 6.948                             |
| Argentina | 8          | +                   | +                   | +                           | –                                             | –                                               | –              | +                     | +                     | +                         | +                          | +                         | 3.996                             |
| Argentina | 9          | +                   | +                   | +                           | –                                             | –                                               | +              | +                     | +                     | +                         | +                          | +                         | 41.712                            |
| Argentina | 10         | +                   | +                   | +                           | +                                             | ND                                              | +              | –                     | –                     | –                         | ND                         | +                         | 2.689                             |
| Mexico    | 11         | +                   | +                   | +                           | –                                             | –                                               | +              | +                     | –                     | –                         | +                          | +                         | 1.470                             |

ELISA = enzyme-linked immunosorbent assay; ND = not done.

DTU). Spiked blood was lysed by the addition of one volume of guanidine hydrochloride 6 M—EDTA 0.2 M and DNA was extracted as described previously. The standard curve was prepared with serial 10-fold dilutions of purified DNA in water. The standard curve (range  $10^6$  to  $10^{-1}$  parasites/mL—Supplemental Figure 3) was repeated on each microplate.

*Trypanosoma cruzi* genotyping by multiplex PCR. The mini-exon gene's intergenic region was amplified using a multiplex PCR, with the primers described in Virreira et al.,<sup>11</sup> which we have named MV1 to MV4. It allowed us to discriminate the *T. cruzi* genotypes (or discrete typing unit [DTU]) present in blood samples as TcI and non-TcI (comprising TcII to TcVI DTUs) by giving amplicons of 220 and 130 bp, respectively (Supplemental Figure 4). Two microlitres (DNA from maternal samples—LEV samples) or 4  $\mu$ L (DNA from cord blood samples—SEV samples) of DNA template were added to each reaction in a total volume of 25  $\mu$ L containing 0.5  $\mu$ M of each primer, 1.75 mM MgCl<sub>2</sub>, 0.1 (LEV samples) or 0.15 mM (SEV samples) of each dNTP and 0.25 (LEV samples) or 0.38 U/assay (SEV samples) of Taq polymerase. Each sample was tested in duplicates. Each PCR run comprised blanks (water), a negative control (DNA extracted from GEB samples from uninfected individuals), and positive controls. Positive controls were DNA extracted from *T. cruzi* epimastigotes of genotype I (strain X10/I) or VI (strain CL Brener) available thanks to a gift from M. Lewis and M. Miles (London School of Hygiene and Tropical Medicine, United Kingdom).

*Sequence analysis.* To obtain enough material for sequencing, purified DNA from GEB samples was amplified by two successive runs of the multiplex PCR described

previously for genotyping. Amplicons were sequenced at Beckman Coulter Genomics by the Sanger method,<sup>56</sup> using each of the PCR primers in separate reactions (MV1 and MV2 when TcI genotype was identified in the sample, MV3 and MV4 when non-TcI was identified). Sequences were analyzed by BLAST (<http://blast.ncbi.nlm.nih.gov/Blast.cgi>). Sequences were edited manually and aligned with *T. cruzi* reference sequences for DTU assignment (TcI or non-TcI DTUs) using MEGA version 5.2 software.<sup>25</sup>

#### SUPPLEMENTAL REFERENCES

- Moser DR, Kirchhoff LV, Donelson JE, 1989. Detection of *Trypanosoma cruzi* by DNA amplification using the polymerase chain reaction. *J Clin Microbiol* 27: 1477–1482.
- Wincker P, Britto C, Pereira JB, Cardoso MA, Oelemann W, Morel CM, 1994. Use of a simplified polymerase chain reaction procedure to detect *Trypanosoma cruzi* in blood samples from chronic chagasic patients in a rural endemic area. *Am J Trop Med Hyg* 51: 771–777.
- Biotium. GelRed™ Nucleic Acid Gel Stain, 10,000x in DMSO. Biotium. Available at: [http://www.biotium.com/product/price\\_and\\_info.asp?item=41002&Sub\\_Section=09A](http://www.biotium.com/product/price_and_info.asp?item=41002&Sub_Section=09A). Accessed December 13, 2016.
- el Bouhdidi A, Truyens C, Rivera MT, Bazin H, Carlier Y, 1994. *Trypanosoma cruzi* infection in mice induces a polyisotypic hypergammaglobulinaemia and parasite-specific response involving high IgG2a concentrations and highly avid IgG1 antibodies. *Parasite Immunol* 16: 69–76.
- Cencig S, Coltel N, Truyens C, Carlier Y, 2011. Parasitic loads in tissues of mice infected with *Trypanosoma cruzi* and treated with AmBisome. *PLoS Negl Trop Dis* 5: E1216.
- Sanger F, Coulson AR, 1975. A rapid method for determining sequences in DNA by primed synthesis with DNA polymerase. *J Mol Biol* 94: 441–448.
